# Supplementary material
Source: HighWire-hosted journal article supplement (https://www.cmajopen.ca/highwire/filestream/88759/field_highwire_adjunct_files/0/open-2021-0257-1-at.pdf)
Supplement: open-2021-0257-1-at.pdf [file open-2021-0257-1-at.pdf]

Appendix 1. Summary of 2009 guidelines and of changes made in the 2016 updates.

| Age group                         | Infection   | Precisions     | 1st antibiotic                | 2nd antibiotic          | Total dosage 1st antibiotic (mg) |         | Total dosage 2nd antibiotic (mg) |                                                    | Changes in 2016 guidelines |                                                  |
|-----------------------------------|-------------|----------------|-------------------------------|-------------------------|----------------------------------|---------|----------------------------------|----------------------------------------------------|----------------------------|--------------------------------------------------|
|                                   |             |                |                               |                         | Minimum                          | Maximum | Minimum                          | Maximum                                            | Antibiotic                 | Total dosage (mg)                                |
| Children (0-17 years old)         | Otitis      |                | Amoxicillin                   |                         |                                  |         |                                  |                                                    |                            |                                                  |
|                                   |             |                | Amoxicillin-clavulanate       |                         |                                  |         |                                  | Can be combined with amoxicillin.                  |                            |                                                  |
|                                   |             |                | Ceftriaxone                   |                         |                                  |         |                                  |                                                    |                            |                                                  |
|                                   |             |                | Azithromycin                  |                         |                                  |         |                                  |                                                    |                            |                                                  |
|                                   |             |                | Cefprozil                     |                         |                                  |         |                                  |                                                    |                            |                                                  |
|                                   |             |                | Cefuroxime                    |                         |                                  |         |                                  |                                                    |                            |                                                  |
|                                   |             |                | Clarithromycin                |                         |                                  |         |                                  |                                                    |                            |                                                  |
|                                   | Pharyngitis |                |                               | Clindamycin             |                                  |         |                                  |                                                    | Not recommended anymore.   |                                                  |
|                                   |             |                |                               | Amoxicillin             |                                  |         |                                  |                                                    |                            |                                                  |
|                                   |             |                |                               | Phenoxymethylpenicillin |                                  |         |                                  |                                                    |                            |                                                  |
|                                   |             |                | if allergic                   | Azithromycin            |                                  |         |                                  |                                                    |                            |                                                  |
|                                   |             |                | if allergic                   | Cefalexin               |                                  |         |                                  |                                                    |                            |                                                  |
|                                   | Pneumonia   |                | if allergic                   | Clarithromycin          |                                  |         |                                  |                                                    |                            |                                                  |
|                                   |             |                |                               | Azithromycin            |                                  |         |                                  |                                                    |                            |                                                  |
|                                   |             |                |                               | Clarithromycin          |                                  |         |                                  |                                                    |                            |                                                  |
|                                   | Sinusitis   |                |                               | Amoxicillin             |                                  |         |                                  |                                                    |                            | Has to be combined with amoxicillin-clavulanate. |
|                                   |             |                |                               | Amoxicillin-clavulanate |                                  |         |                                  |                                                    |                            |                                                  |
|                                   |             |                |                               | Cefuroxime              |                                  |         |                                  |                                                    |                            |                                                  |
|                                   |             |                | if allergic                   | Cefprozil               |                                  |         |                                  |                                                    |                            | Cefprozil now recommended.                       |
|                                   |             |                | if allergic                   | Cefuroxime              |                                  |         |                                  |                                                    |                            | Can be combined with amoxicillin.                |
| COPD exacerbations and bronchitis |             | if allergic    | Clarithromycin                |                         |                                  |         |                                  |                                                    |                            |                                                  |
|                                   |             | if allergic    | Clindamycin                   |                         |                                  |         |                                  |                                                    | Not recommended anymore.   |                                                  |
|                                   |             | if COPD        | Amoxicillin                   | 10500                   | 10500                            |         |                                  |                                                    |                            |                                                  |
|                                   |             | if COPD        | Amoxicillin-clavulanate       | 10500                   | 12250                            |         |                                  |                                                    |                            |                                                  |
|                                   |             | if COPD        | Azithromycin                  | 1500                    | 1500                             |         |                                  |                                                    |                            |                                                  |
|                                   |             | if COPD        | Cefuroxime                    | 5000                    | 5000                             |         |                                  |                                                    |                            |                                                  |
|                                   |             | if COPD        | Ciprofloxacin                 | 7000                    | 15000                            |         |                                  |                                                    |                            |                                                  |
|                                   |             | if COPD        | Clarithromycin                | 7000                    | 7000                             |         |                                  |                                                    | No update in 2016.         |                                                  |
|                                   |             | if COPD        | Doxycycline                   | 2000                    | 2000                             |         |                                  |                                                    |                            |                                                  |
|                                   |             | if COPD        | Levofloxacin                  | 3500                    | 3750                             |         |                                  |                                                    |                            |                                                  |
| Adults                            | Pharyngitis |                | Moxifloxacin                  | 2000                    | 2000                             |         |                                  |                                                    |                            |                                                  |
|                                   |             |                | Trimethoprim-sulfamethoxazole | 3200                    | 3200                             |         |                                  |                                                    |                            |                                                  |
|                                   |             |                |                               | Phenoxymethylpenicillin | 12000                            | 12000   |                                  |                                                    |                            |                                                  |
|                                   |             |                | if allergic                   | Azithromycin            | 1500                             | 1500    |                                  |                                                    |                            |                                                  |
|                                   |             |                | if allergic                   | Cefadroxil              | 10000                            | 10000   |                                  |                                                    |                            |                                                  |
|                                   | Pneumonia   |                | if allergic                   | Cefalexin               | 10000                            | 10000   |                                  |                                                    |                            |                                                  |
|                                   |             |                | if allergic                   | Clarithromycin          | 5000                             | 5000    |                                  |                                                    |                            |                                                  |
|                                   |             |                |                               | Azithromycin            | 1500                             | 1500    |                                  |                                                    |                            | Amoxicillin now recommended. 10000               |
|                                   |             |                |                               | Clarithromycin          | 7000                             | 7000    |                                  |                                                    |                            | Clindamycin now recommended if allergic. 9000    |
|                                   |             |                | if allergic                   | Doxycycline             | 2000                             | 2000    |                                  |                                                    |                            |                                                  |
|                                   |             | if comorbidity | Amoxicillin                   | 30000                   | 30000                            | 1500    | 1500                             |                                                    |                            |                                                  |
|                                   |             | if comorbidity | Amoxicillin                   | 30000                   | 30000                            | 7000    | 7000                             |                                                    |                            |                                                  |
|                                   |             | if comorbidity | Amoxicillin-clavulanate       | 15000                   | 17500                            | 1500    | 1500                             |                                                    | No update in 2016.         |                                                  |
|                                   |             | if comorbidity | Amoxicillin-clavulanate       | 15000                   | 17500                            | 7000    | 7000                             |                                                    |                            |                                                  |
|                                   |             | if comorbidity | Azithromycin                  | 1500                    | 1500                             | 7000    | 7000                             |                                                    |                            |                                                  |
| Sinusitis                         |             | if comorbidity | Cefuroxime                    | 7000                    | 7000                             | 7000    | 7000                             |                                                    |                            |                                                  |
|                                   |             | if comorbidity | Levofloxacin                  | 3500                    | 7000                             |         |                                  |                                                    |                            |                                                  |
|                                   |             | if comorbidity | Moxifloxacin                  | 4000                    | 4000                             |         |                                  |                                                    |                            |                                                  |
|                                   |             |                | Amoxicillin                   | 15000                   | 15000                            |         |                                  |                                                    | 7500 only                  |                                                  |
|                                   |             |                | Amoxicillin-clavulanate       | 15000                   | 17500                            |         |                                  |                                                    | 10500 to 12250             |                                                  |
|                                   |             |                | Levofloxacin                  | 5000                    | 5000                             |         |                                  |                                                    |                            |                                                  |
|                                   |             |                | Moxifloxacin                  | 2800                    | 2800                             |         |                                  |                                                    | 2000 only                  |                                                  |
|                                   |             | if allergic    | Cefuroxime                    | 3500                    | 3500                             |         |                                  |                                                    |                            |                                                  |
|                                   |             | if allergic    | Clarithromycin                | 7000                    | 14000                            |         |                                  |                                                    | 7000 only                  |                                                  |
|                                   |             | if allergic    | Trimethoprim-sulfamethoxazole | 32000                   | 32000                            |         |                                  |                                                    |                            |                                                  |
|                                   |             |                |                               |                         |                                  |         |                                  | Cefixime now recommended if allergic. 4000 only    |                            |                                                  |
|                                   |             |                |                               |                         |                                  |         |                                  | Doxycycline now recommended if allergic. 2000 only |                            |                                                  |

Note: This table presents the information relevant to our analyses, it does not present the entire content of the guidelines.
